# Supplementary material
Source: publisher figshare collection journal article supplement (https://frontiersin.figshare.com/ndownloader/files/32985647)
Supplement: Supplementary file 1 [file 32985647]

## Sheet: Sheet1
Table S1: Statistics Summary Data Sheet					Fig. 3a: One-Way ANOVA
					Direct Comparison	diff	lwr	upr	p adj
Fig. 2: Generalized linear model with Poisson distribution					West, Belize - South, Belize	-1.89419	-3.10468	-0.683689	0.002262
and post-hoc estimated marginal means pairwise analysis
Call:					Fig. 3b: One-Way ANOVA and Post-Hoc Tukey Test
glm(formula = densities_data_noModulus$Density					Category	Df	Sum Sq	Mean Sq	F Value	Pr(>F)
~ Time_updated * species_updated, family = "poisson")					Locations	2	10.97	5.484	1.894	0.157
Deviance Residuals:					---
Min 1Q Median 3Q Max					Residuals	79	228.79	2.896
-2.5560 -0.9661 -0.6325 0.6053 4.0551					Signif. codes: 0 ‘***’ 0.001 ‘**’ 0.01 ‘*’ 0.05 ‘.’ 0.1 ‘ ’ 1
Coefficients:					Direct Comparison	diff	lwr	upr	p adj
Estimate					St. Croix-San Salvador, Bahamas	0.522546	-0.575334	1.62043	0.494413
(Intercept) -1.6094					Tampa Bay, Florida - San Salvador, Bahamas	0.878672	-0.208436	1.96578	0.136815
Time_updatedNight 1.3863					Tampa Bay, Florida - St. Croix	0.356125	-0.760812	1.47306	0.727518
species_updatedIvory Cerith 1.2993
species_updatedLong-spined Star Snail 1.6094					Fig. 4: Spearman's rank correlation test: Blade Scars vs. Smooth Tegula Density
species_updatedSmooth Tegula 0.5108					Spearman's rank correlation rho
species_updatedStocky Cerith 0.5108
Time_updatedNight:species_updatedIvory Cerith -1.8383					data: radulations_data$SmoothTegulaDensity and radulations_data$SmoothTegulaScars
Time_updatedNight:species_updatedLong-spined Star Snail -2.1484					S = 9.0549, p-value = 3.713e-05
Time_updatedNight:species_updatedSmooth Tegula 1.1632					alternative hypothesis: true rho is not equal to 0
Time_updatedNight:species_updatedStocky Cerith 0.8961					sample estimates:
Std. Error z value					rho
(Intercept) 0.5773 -2.788					0.945122
Time_updatedNight 0.6454 2.148
species_updatedIvory Cerith 0.6513 1.995					Fig. 4: Spearman's rank correlation test: Blade Scars vs. Stocky Cerith Density
species_updatedLong-spined Star Snail 0.6324 2.545					Spearman's rank correlation rho
species_updatedSmooth Tegula 0.7302 0.700
species_updatedStocky Cerith 0.7302 0.700					data: radulations_data$StockyDensity and radulations_data$StockyScars
Time_updatedNight:species_updatedIvory Cerith 0.8064 -2.280					S = 76.57, p-value = 0.1103
Time_updatedNight:species_updatedLong-spined Star Snail 0.7913 -2.715					alternative hypothesis: true rho is not equal to 0
Time_updatedNight:species_updatedSmooth Tegula 0.7951 1.463					sample estimates:
Time_updatedNight:species_updatedStocky Cerith 0.7981 1.123					rho
Pr(>|z|)					0.535942
(Intercept) 0.00530 **
Time_updatedNight 0.03173 *					Fig. 5: One-Way ANOVA and Tukey Test, Florida Fungal Biomass vs. Scarring Data
species_updatedIvory Cerith 0.04605 *					Direct Comparison	diff	lwr	upr	p adj
species_updatedLong-spined Star Snail 0.01093 *					Scarred-Not scarred	0.340628	0.20762	0.473635	1.22e-05
species_updatedSmooth Tegula 0.48422
species_updatedStocky Cerith 0.48420					Additional Referenced Statistics
Time_updatedNight:species_updatedIvory Cerith 0.02264 *					Comparing Emerald Nerite and Smooth Tegula, length of scars, grazing during the feeding trial, ANOVA
Time_updatedNight:species_updatedLong-spined Star Snail 0.00662 **					summary(aov(grazing_analysis_df$Length ~ grazing_analysis_df$Group))
Time_updatedNight:species_updatedSmooth Tegula 0.14350					Df Sum Sq Mean Sq F value Pr(>F)
Time_updatedNight:species_updatedStocky Cerith 0.26152					grazing_analysis_df$Group 1 12.25 12.250 2.06 0.173
---					Residuals 14 83.25 5.946
Signif. codes: 0 ‘***’ 0.001 ‘**’ 0.01 ‘*’ 0.05 ‘.’ 0.1 ‘ ’ 1
					Comparing Emerald Nerite and Smooth Tegula, total number of scars, grazing during the feeding trial, ANOVA
(Dispersion parameter for poisson family taken to be 1)					> summary(aov(grazing_analysis_df$NumScars ~ grazing_analysis_df$Group))
					Df Sum Sq Mean Sq F value Pr(>F)
Null deviance: 354.28 on 149 degrees of freedom					grazing_analysis_df$Group 1 2.25 2.250 0.39 0.542
Residual deviance: 178.64 on 140 degrees of freedom					Residuals 14 80.75 5.768
AIC: 393.8
Number of Fisher Scoring iterations: 5
emmeans' R package, Estimated Marginal Means pairwise comparisons analysis
contrast estimate SE df z.ratio p.value
Day Emerald Nerite - Night Emerald Nerite -1.386 0.645 Inf -2.148 0.4933
Day Emerald Nerite - Day Ivory Cerith -1.299 0.651 Inf -1.995 0.6026
Day Emerald Nerite - Night Ivory Cerith -0.847 0.690 Inf -1.228 0.9681
Day Emerald Nerite - (Day Long-spined Star Snail) -1.609 0.632 Inf -2.545 0.2445
Day Emerald Nerite - (Night Long-spined Star Snail) -0.847 0.690 Inf -1.228 0.9681
Day Emerald Nerite - Day Smooth Tegula -0.511 0.730 Inf -0.700 0.9995
Day Emerald Nerite - Night Smooth Tegula -3.060 0.591 Inf -5.181 <.0001
Day Emerald Nerite - Day Stocky Cerith -0.511 0.730 Inf -0.700 0.9995
Day Emerald Nerite - Night Stocky Cerith -2.793 0.595 Inf -4.697 0.0001
Night Emerald Nerite - Day Ivory Cerith 0.087 0.417 Inf 0.208 1.0000
Night Emerald Nerite - Night Ivory Cerith 0.539 0.476 Inf 1.133 0.9813
Night Emerald Nerite - (Day Long-spined Star Snail) -0.223 0.387 Inf -0.576 0.9999
Night Emerald Nerite - (Night Long-spined Star Snail) 0.539 0.476 Inf 1.133 0.9813
Night Emerald Nerite - Day Smooth Tegula 0.875 0.532 Inf 1.645 0.8260
Night Emerald Nerite - Night Smooth Tegula -1.674 0.315 Inf -5.321 <.0001
Night Emerald Nerite - Day Stocky Cerith 0.875 0.532 Inf 1.645 0.8260
Night Emerald Nerite - Night Stocky Cerith -1.407 0.322 Inf -4.368 0.0005
Day Ivory Cerith - Night Ivory Cerith 0.452 0.483 Inf 0.935 0.9953
Day Ivory Cerith - (Day Long-spined Star Snail) -0.310 0.397 Inf -0.781 0.9988
Day Ivory Cerith - (Night Long-spined Star Snail) 0.452 0.483 Inf 0.935 0.9953
Day Ivory Cerith - Day Smooth Tegula 0.788 0.539 Inf 1.462 0.9071
Day Ivory Cerith - Night Smooth Tegula -1.761 0.326 Inf -5.395 <.0001
Day Ivory Cerith - Day Stocky Cerith 0.788 0.539 Inf 1.462 0.9070
Day Ivory Cerith - Night Stocky Cerith -1.494 0.334 Inf -4.478 0.0003
Night Ivory Cerith - (Day Long-spined Star Snail) -0.762 0.458 Inf -1.665 0.8152
Night Ivory Cerith - (Night Long-spined Star Snail) 0.000 0.534 Inf 0.000 1.0000
Night Ivory Cerith - Day Smooth Tegula 0.336 0.586 Inf 0.575 0.9999
Night Ivory Cerith - Night Smooth Tegula -2.213 0.398 Inf -5.559 <.0001
Night Ivory Cerith - Day Stocky Cerith 0.336 0.585 Inf 0.575 0.9999
Night Ivory Cerith - Night Stocky Cerith -1.946 0.404 Inf -4.816 0.0001
(Day Long-spined Star Snail) - (Night Long-spined Star Snail) 0.762 0.458 Inf 1.665 0.8152
(Day Long-spined Star Snail) - Day Smooth Tegula 1.099 0.516 Inf 2.127 0.5078
(Day Long-spined Star Snail) - Night Smooth Tegula -1.451 0.287 Inf -5.058 <.0001
(Day Long-spined Star Snail) - Day Stocky Cerith 1.099 0.516 Inf 2.128 0.5076
(Day Long-spined Star Snail) - Night Stocky Cerith -1.184 0.295 Inf -4.012 0.0024
(Night Long-spined Star Snail) - Day Smooth Tegula 0.336 0.586 Inf 0.575 0.9999
(Night Long-spined Star Snail) - Night Smooth Tegula -2.213 0.398 Inf -5.559 <.0001
(Night Long-spined Star Snail) - Day Stocky Cerith 0.336 0.585 Inf 0.575 0.9999
(Night Long-spined Star Snail) - Night Stocky Cerith -1.946 0.404 Inf -4.816 0.0001
Day Smooth Tegula - Night Smooth Tegula -2.549 0.464 Inf -5.490 <.0001
Day Smooth Tegula - Day Stocky Cerith 0.000 0.632 Inf 0.000 1.0000
Day Smooth Tegula - Night Stocky Cerith -2.282 0.469 Inf -4.862 0.0001
Night Smooth Tegula - Day Stocky Cerith 2.549 0.464 Inf 5.491 <.0001
Night Smooth Tegula - Night Stocky Cerith 0.267 0.190 Inf 1.407 0.9255
Day Stocky Cerith - Night Stocky Cerith -2.282 0.469 Inf -4.862 0.0001
Results are given on the log (not the response) scale.
P value adjustment: tukey method for comparing a family of 10 estimates
